# Supplementary material for: Plant trichomes and a single gene GLABRA1 contribute to insect community composition on field-grown Arabidopsis thaliana
Source: BMC Plant Biol. 2019 Apr 27;19:163. doi: 10.1186/s12870-019-1705-2 (PMC6486987; doi:10.1186/s12870-019-1705-2)
Supplement: Supplementary file 3 — Likelihood ratio tests for estimating broad-sense heritability H2. Likelihood ratio, LR-χ2, was tested by comparing the models with and without a random effect of the accession ID. P-values were based on a χ2 distribution with one degree of freedom and corrected by false discovery rate (FDR) [68]. Bold values indicate significant H2 at Pfdr < 0.05. Bars indicate no information available due to low abundance. (XLSX 11 kb) [file 12870_2019_1705_MOESM3_ESM.xlsx]

## Sheet: Additional_file_3
Response	Zurich			Otsu
	H2	LR-χ2	Pfdr	H2	LR-χ2	Pfdr
Turnip sawfly	---	---	---	0.33	41	2.0.E-09
Leaf holes	0.4	55.1	1.5.E-12	---	---	---
Striped flea beetle	0.16	12.6	1.2.E-03	---	---	---
Turnip flea beetle	0.01	0.16	0.75	---	---	---
Diamond back moth	1.6e-09	-6.5e-08	1	0.07	2.87	0.13
Cabbage butterfly	---	---	---	0.05	1.92	0.22
Green peach aphid	---	---	---	0.03	0.55	0.5
Mustard aphid	0.04	1.3	0.32	0.03	0.48	0.5
Western flower thrip	0.32	38.8	3.1.E-09	0.03	0.46	0.5
Leaf chewer	0.14	10.4	0.003	0.28	31.3	9.4.E-08
Internal feeder	0.04	1.22	0.32	0.14	9.7	0.003
Specialist	0.11	6.32	0.02	0.25	25.8	1.0.E-06
Generalist	0.17	13.2	0.001	0.12	7.5	0.01
Species richness	0.11	6.82	0.02	0.26	27.3	5.8.E-07
Shannon diversity	0.11	6.1	0.02	0.17	13.4	0.001
Total abundance	0.1	5.97	0.02	0.29	33	5.9.E-08
